# Supplementary material for: Substituent Effects of the Nitrogen Heterocycle on Indole and Quinoline HDN Performance: A Combination of Experiments and Theoretical Study
Source: MDPI journal article supplement (doi:10.3390/ijms24033044), 2023-02-03
Supplement: s1 [file s1]

1. The chromatograms for indole and Quinoline HDN products and the corresponding positions.

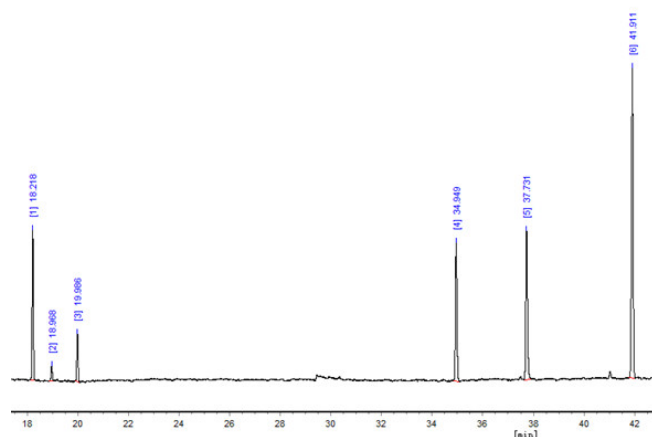

GC-spectrogram of indole HDN product

| Peak number | Peak position/min | Product                  | formula      | structural |
|-------------|-------------------|--------------------------|--------------|------------|
| 1           | 18.2              | Ethyl-cyclohexane (ECH)  | $C_8H_{16}$  |            |
| 2           | 18.9              | Ethyl-benzene (EB)       | $C_8H_{10}$  |            |
| 3           | 20.0              | Ethyl-cyclohexene (ECHE) | $C_8H_{14}$  |            |
| 4           | 34.5              | o-ethylaniline (OEA)     | $C_8NH_{15}$ |            |
| 5           | 37.7              | Indoline (DHI)           | $C_8NH_7$    |            |
| 6           | 41.9              | Indole (IND)             | $C_8NH_5$    |            |

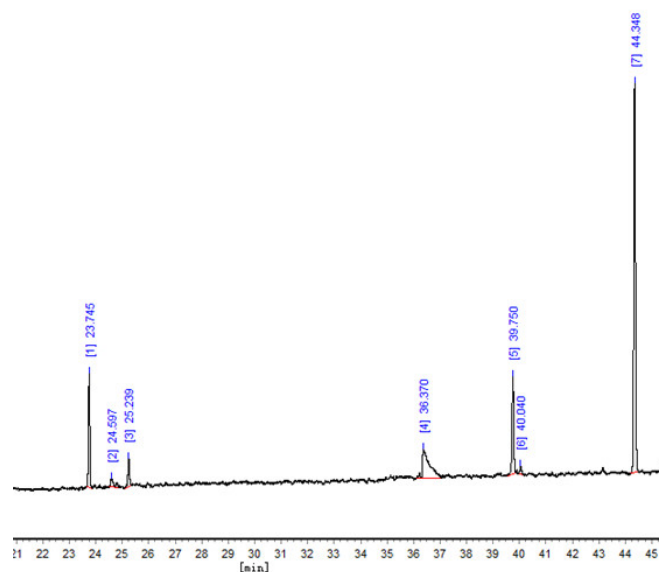

**GC-spectrogram of Quinoline HDN product**

| Peak number | Peak position/min | Product                             | formula      | structural |
|-------------|-------------------|-------------------------------------|--------------|------------|
| 1           | 23.8              | Propyl-cyclohexane (PCH)            | $C_9H_{18}$  |            |
| 2           | 24.6              | Propyl-benzene (PB)                 | $C_9H_{12}$  |            |
| 3           | 25.2              | Propyl-cyclohexene (PCHE)           | $C_9H_{16}$  |            |
| 4           | 37.4              | Decahydro-quinoline (DHQ)           | $C_9NH_{17}$ |            |
| 5           | 39.8              | 5,6,7,8-tetrahydroquinoline (THQ-5) | $C_9NH_{11}$ |            |
| 6           | 40.4              | o-propylaniline (OPA)               | $C_9NH_{13}$ |            |
| 7           | 43.1              | Quinoline (QL)                      | $C_9NH_7$    |            |
| 8           | 44.3              | 1,2,3,4-tetrahydroquinoline (THQ-1) | $C_9NH_{11}$ |            |

## 2. HDN products and the corresponding positions of substituent nitrogen compounds

| HDN product distribution of 2-methyl-indole (2-M-IND) |                   |                                       |                                 |                                                                                       |
|-------------------------------------------------------|-------------------|---------------------------------------|---------------------------------|---------------------------------------------------------------------------------------|
| Peak number                                           | Peak position/min | Product                               | formula                         | structural                                                                            |
| 1                                                     | 23.3              | iso-Propyl-cyclohexane<br>i-PCH       | C <sub>9</sub> H <sub>18</sub>  | 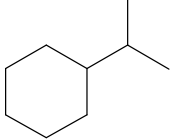   |
| 2                                                     | 23.8              | Propyl-cyclohexane<br>(PCH)           | C <sub>9</sub> H <sub>18</sub>  |    |
| 3                                                     | 25.2              | Propyl-cyclohexene<br>(PCHE)          | C <sub>9</sub> H <sub>16</sub>  |    |
| 4                                                     | 39.5              | dihydro-2-methyl-indole<br>DH-2-M-IND | C <sub>9</sub> NH <sub>11</sub> |    |
| 5                                                     | 40.4              | o-propylaniline<br>(OPA)              | C <sub>9</sub> NH <sub>13</sub> |   |
| 6                                                     | 44.9              | 2-M-IND                               | C <sub>9</sub> NH <sub>9</sub>  |  |

### HDN product distribution of 3-methyl-indole (3-M-IND)

| Peak number | Peak position/min | Product                               | formula                          | structural                                                                            |
|-------------|-------------------|---------------------------------------|----------------------------------|---------------------------------------------------------------------------------------|
| 1           | 23.3              | i-PCH                                 | C <sub>9</sub> H <sub>18</sub>   | 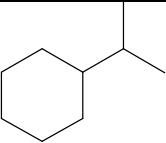   |
| 2           | 24.7              | Isopropyl-cyclohexenyl<br>i-PCHE      | C <sub>9</sub> H <sub>16</sub>   |    |
| 3           | 26.2              | Iso-propenyl-aniline<br>i-OPEA        | C <sub>9</sub> H <sub>16</sub>   |    |
| 4           | 39.0              | Isopropylaniline<br>i-OPA             | C <sub>9</sub> H <sub>13</sub> N |    |
| 5           | 41.1              | dihydro-3-methyl-indole<br>DH-3-M-IND | C <sub>9</sub> H <sub>11</sub> N |   |
| 6           | 45.5              | 3-M-IND                               | C <sub>9</sub> H <sub>9</sub> N  |  |

**HDN product distribution of 2-methyl-quinoline (2-M-QL)**

| Peak number | Peak position/min | Product                                             | formula                          | structural                                                                           |
|-------------|-------------------|-----------------------------------------------------|----------------------------------|--------------------------------------------------------------------------------------|
| 1           | 28.1              | Butyl-cyclohexane<br>BCH                            | C <sub>10</sub> H <sub>20</sub>  | 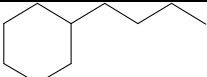  |
| 2           | 29.2              | 2-butyl-cyclohexene<br>(2-BCHE)                     | C <sub>10</sub> H <sub>14</sub>  |   |
| 3           | 29.5              | 1-butyl-cyclohexene<br>(1-BCHE)                     | C <sub>10</sub> H <sub>18</sub>  |   |
| 4           | 37.4              | 2-methyl-decahydro-quinoline<br>(2-M-DHQ)           | C <sub>10</sub> NH <sub>19</sub> |   |
| 5           | 42.2              | 2-methyl-5,6,7,8-tetrahydroquinoline<br>2-M-THQ-5   | C <sub>10</sub> NH <sub>13</sub> |   |
| 6           | 44.7              | 2-M-QL                                              | C <sub>10</sub> NH <sub>9</sub>  |   |
| 7           | 45.6              | O-butyl-aniline<br>OBA                              | C <sub>10</sub> NH <sub>15</sub> |   |
| 8           | 46.1              | 2-methyl-1,2,3,4-tetrahydroquinoline<br>(2-M-THQ-1) | C <sub>10</sub> NH <sub>13</sub> |  |

**HDN product distribution of 3-methyl-quinoline (3-M-QL)**

| Peak number | Peak position/min | Product                                             | formula                          | structural                                                                            |
|-------------|-------------------|-----------------------------------------------------|----------------------------------|---------------------------------------------------------------------------------------|
| 1           | 27.6              | iso-butyl-cyclohexane<br>i-BCH                      | C <sub>10</sub> H <sub>20</sub>  | 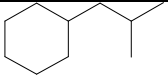   |
| 2           | 28.8              | 2-iso-butyl-cyclohexene<br>2-i-BCHE                 | C <sub>10</sub> H <sub>14</sub>  |    |
| 3           | 29.1              | 1-iso-butyl-cyclohexene<br>1-i-BCHE                 | C <sub>10</sub> H <sub>18</sub>  |    |
| 4           | 38.4              | 3-methyl-decahydro-quinoline<br>3-M-DHQ             | C <sub>10</sub> NH <sub>19</sub> |    |
| 5           | 44.3              | iso-ortho-butyl-aniline<br>i-OBA                    | C <sub>10</sub> NH <sub>13</sub> |    |
| 6           | 44.9              | 3-methyl-5,6,7,8-tetrahydroquinoline<br>3-M-THQ-5   | C <sub>10</sub> NH <sub>9</sub>  |    |
| 7           | 46.1              | 3-M-QL                                              | C <sub>10</sub> NH <sub>15</sub> |   |
| 8           | 47.7              | 3-methyl-1,2,3,4-tetrahydroquinoline<br>(3-M-THQ-1) | C <sub>10</sub> NH <sub>13</sub> |  |
